# Supplementary material for: Rasch Analysis of Self-Reported Adherence to Patient-Centered Physical Therapy Scale among Japanese Physical Therapists: Cross-Sectional Study
Source: MDPI journal article supplement (doi:10.3390/ijerph181910282), 2021-09-29
Supplement: s1 [file s1]

**Table S1.** Descriptions of the 14-item Self-reported Adherence to Patient-Centered Physical Therapy Scale.

|                                                                                                               |
|---------------------------------------------------------------------------------------------------------------|
| Item 4: Identify with the patient the barriers they are likely to face in making lifestyle change             |
| Item 5: Support the patient to make decisions about what treatment options are best for them                  |
| Item 8: Help the patient to manage any impacts of their disease on their work or personal life                |
| Item 9: Support the patient in identifying lifestyle changes they are willing to make                         |
| Item 11: Identify with the patient the skills they have to manage their symptoms                              |
| Item 17: Explore with the patient strategies for managing their emotions                                      |
| Item 19: Develop a care plan with the patient for long-term management of their condition                     |
| Item 20: Help the patient monitor their progress in making lifestyle change                                   |
| Item 29: Encourage the patient to seek information about managing their condition                             |
| Item 30: Identify with the patient their confidence to about managing their condition                         |
| Item 33: Explore with the patient strategies that have helped them manage their chronic condition in the past |
| Item 34: Help the patient identify what works for them to change their lifestyle                              |
| Item 35: Help the patient to monitor symptoms of their disease                                                |
| Item 38: Explore with the patient strategies for changing behavior                                            |

Item numbers correspond with the 40-item Healthcare Providers Patient-Activation Scale [1].

#### Reference

1. Shand, L.; Higgins, R.; Murphy, B.; Jackson, A. Development and validation of the healthcare providers patient-activation scale. *Patient Educ. Couns.* 2019, 102, 1550–1557, doi:10.1016/j.pec.2019.03.005.
