# Supplementary material for: Rasch Analysis of Self-Reported Adherence to Patient-Centered Physical Therapy Scale among Japanese Physical Therapists: Cross-Sectional Study
Source: MDPI journal article supplement (doi:10.3390/ijerph181910282), 2021-09-29
Supplement: s1 [file s1]

**Table S2.** The seven-item Self-reported Adherence to Patient-Centered Physical Therapy Scale. Please remember your current clinical practice. Please mark the most suitable frequency associated with each tested item.

[illegible]

Item numbers in the bracket correspond with the 40-item Healthcare Providers Patient-Activation Scale [1].

あなたの現在の臨床実践についてお聞きます。各文の内容を行なっている頻度について最も適当なところに印をつけてください。

[illegible]

---

自身の症状を管理するために、患者がどのような  
スキルを有しているかを患者と一緒に確認する

---

患者が自身のライフスタイル変更の進捗度を把握  
できるように手助けする

---

ライフスタイルを変更するために何が効果的である  
かを患者自身がわかるように手助けをする

---

行動・ふるまいを変えるための方法を患者と一緒に  
に探る

---

#### Reference

1. Shand, L.; Higgins, R.; Murphy, B.; Jackson, A. Development and validation of the healthcare providers patient-activation scale. Patient Educ. Couns. 2019, 102, 1550–1557, doi:10.1016/j.pec.2019.03.005.
