# Supplementary material for: Rasch Analysis of Self-Reported Adherence to Patient-Centered Physical Therapy Scale among Japanese Physical Therapists: Cross-Sectional Study
Source: MDPI journal article supplement (doi:10.3390/ijerph181910282), 2021-09-29
Supplement: s1 [file s1]

**Table S3.** Conversion table from raw total scores to 0-100 Rasch scores.

| <b>Raw total score</b> | <b>0-100 Rasch score</b> | <b>Raw total score</b> | <b>0-100 Rasch score</b> | <b>Raw total score</b> | <b>0-100 Rasch score</b> |
|------------------------|--------------------------|------------------------|--------------------------|------------------------|--------------------------|
| 0                      | 0                        | 24                     | 40.53                    | 48                     | 56.07                    |
| 1                      | 11.79                    | 25                     | 41.09                    | 49                     | 56.96                    |
| 2                      | 17.92                    | 26                     | 41.64                    | 50                     | 57.89                    |
| 3                      | 21.31                    | 27                     | 42.19                    | 51                     | 58.84                    |
| 4                      | 23.66                    | 28                     | 42.74                    | 52                     | 59.82                    |
| 5                      | 25.48                    | 29                     | 43.30                    | 53                     | 60.84                    |
| 6                      | 26.97                    | 30                     | 43.85                    | 54                     | 61.87                    |
| 7                      | 28.25                    | 31                     | 44.42                    | 55                     | 62.93                    |
| 8                      | 29.38                    | 32                     | 44.98                    | 56                     | 64.02                    |
| 9                      | 30.40                    | 33                     | 45.56                    | 57                     | 65.13                    |
| 10                     | 31.32                    | 34                     | 46.14                    | 58                     | 66.26                    |
| 11                     | 32.18                    | 35                     | 46.74                    | 59                     | 67.43                    |
| 12                     | 32.98                    | 36                     | 47.34                    | 60                     | 68.63                    |
| 13                     | 33.74                    | 37                     | 47.96                    | 61                     | 69.88                    |
| 14                     | 34.46                    | 38                     | 48.59                    | 62                     | 71.20                    |
| 15                     | 35.14                    | 39                     | 49.24                    | 63                     | 72.60                    |
| 16                     | 35.81                    | 40                     | 49.91                    | 64                     | 74.14                    |
| 17                     | 36.44                    | 41                     | 50.59                    | 65                     | 75.86                    |
| 18                     | 37.06                    | 42                     | 51.30                    | 66                     | 77.85                    |
| 19                     | 37.67                    | 43                     | 52.03                    | 67                     | 80.32                    |
| 20                     | 38.26                    | 44                     | 52.78                    | 68                     | 83.68                    |
| 21                     | 38.84                    | 45                     | 53.56                    | 69                     | 89.40                    |
| 22                     | 39.41                    | 46                     | 54.37                    | 70                     | 100                      |
| 23                     | 39.97                    | 47                     | 55.20                    |                        |                          |
